# Supplementary material
Source: HighWire-hosted journal article supplement (http://www.cmaj.ca/highwire/filestream/58316/field_highwire_adjunct_files/1/test-dend-2-at_online_.pdf)
Supplement: test-dend-2-at_online_.pdf [file test-dend-2-at_online_.pdf]

## Appendix 2: Results of cost-effectiveness analysis of testing strategies used to determine HER2 status

| Testing strategy*               | Median (95% credible interval) |                                                     |                                                      |                                                                |                                                                           |
|---------------------------------|--------------------------------|-----------------------------------------------------|------------------------------------------------------|----------------------------------------------------------------|---------------------------------------------------------------------------|
|                                 | % of patients undergoing FISH  | Annual cost of screening 1000 patients, \$ thousand | % of patients with accurately determined HER2 status | Incremental cost-effectiveness ratio per correct diagnosis, \$ | Annual cost of trastuzumab therapy per 1000 patients screened, \$ million |
| Strategy 1 (base strategy)      | 12.0 (3.1-21.3)                | 164 (124-208)                                       | 96.4 (94.7-97.5)                                     | —                                                              | 10 (7-13)                                                                 |
| Strategy 2                      | 0.0 (—)                        | 108 (—)                                             | 88.2 (80.8-93.9)                                     | 664 (531-1074)‡                                                | 14 (11-18)                                                                |
| Strategy 3                      | 0.0 (—)                        | 108 (—)                                             | 92.9 (87.9-95.7)                                     | 1569 (826-3883)§                                               | 8 (5-12)                                                                  |
| Strategy 4                      | 83.8 (77.1-89.5)               | 331 (198-480)                                       | 98.2 (96.9-99.1)                                     | 9519 (2599-17 980)¶                                            | 11 (8-14)                                                                 |
| Strategy 5 (selected strategy†) | 28.3 (21.8-36.0)               | 240 (208-277)                                       | 97.6 (96.4-98.4)                                     | 6175 (3630-12 140)                                             | 9 (7-12)                                                                  |
| Strategy 6                      | 63.8 (36.1-94.1)               | 406 (275-555)                                       | 99.4 (98.7-99.9)                                     | 8061 (3972-13 570)                                             | 10 (8-13)                                                                 |
| Strategy 7                      | 100.0 (—)                      | 467 (—)                                             | 100.0 (—)                                            | 8401 (5879-11 970)                                             | 11 (8-13)                                                                 |

Note: FISH = fluorescence in situ hybridization.

\*See Table 1 for descriptions of testing strategies.

†Selected as having the lowest incremental cost-effectiveness ratio.

‡Dominated, simple (less accurate and more expensive than base strategy).

§Eliminated (less accurate and less expensive than base strategy).

¶Dominated, extended (less accurate and higher cost-effectiveness ratio than base strategy).
